# Supplementary material for: Characterizing the tumor microenvironment at the single-cell level reveals a novel immune evasion mechanism in osteosarcoma
Source: PubMed Central journal article supplement (PMC9810605; doi:10.1038/s41413-022-00237-6), 2023-01-03

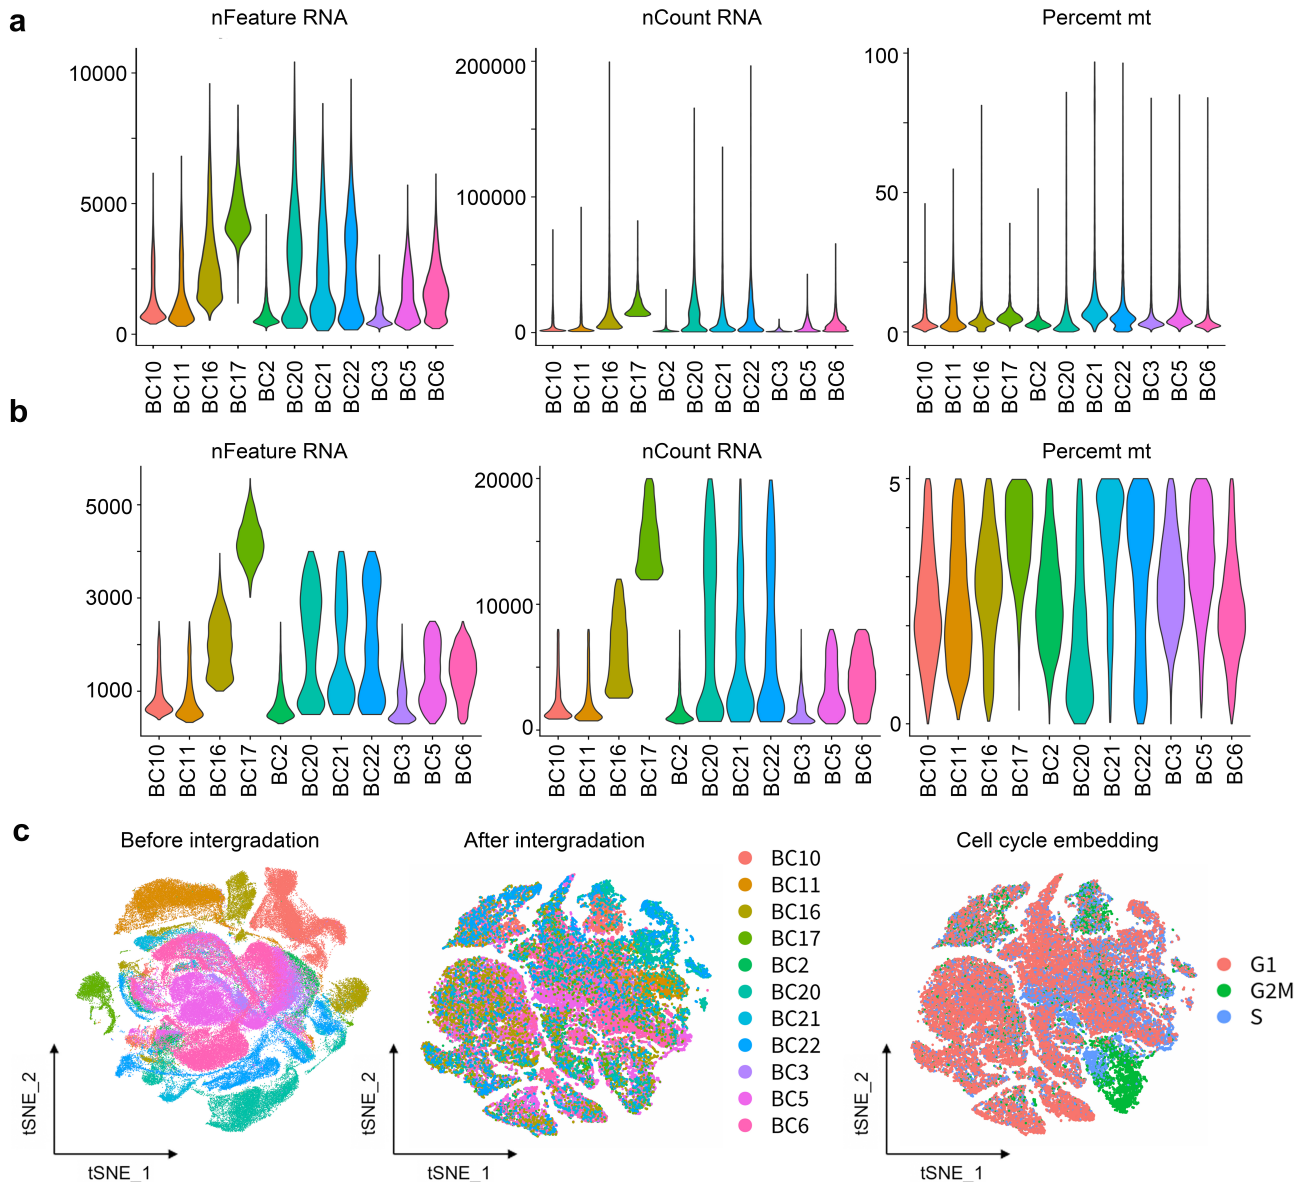

### Myeloid Cell

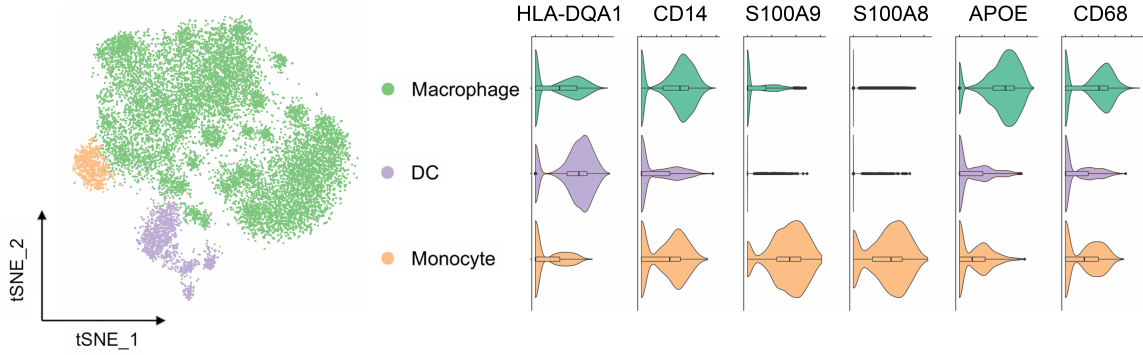

### Lymphocyte

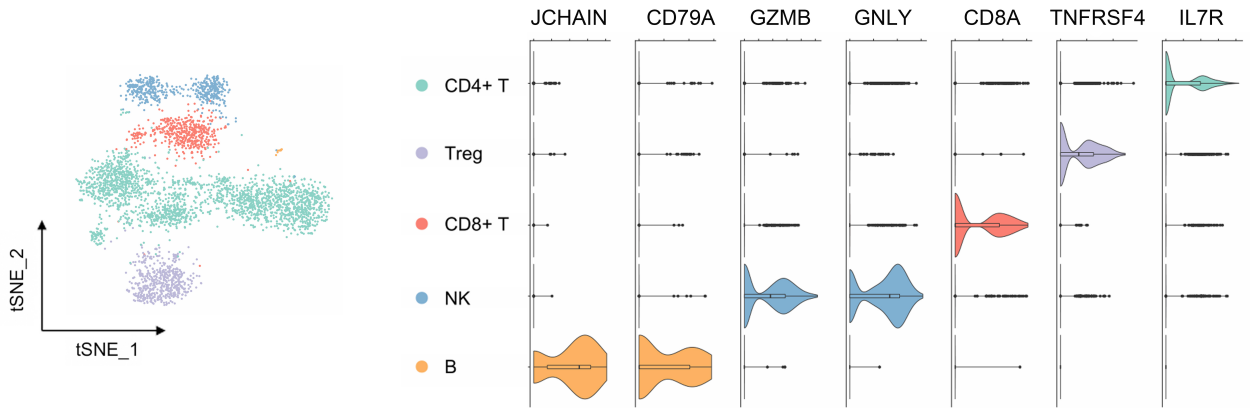

### Cancer Associated Fibroblast

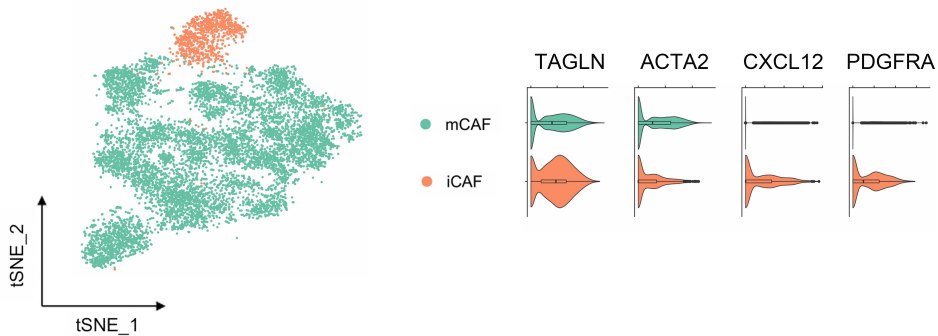

**a**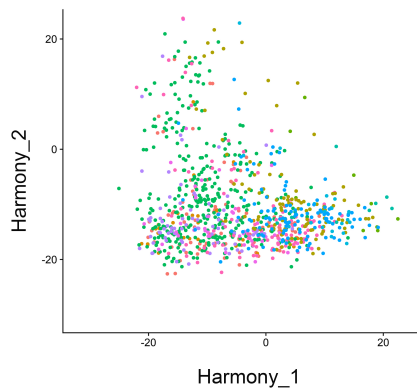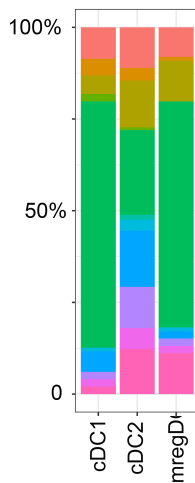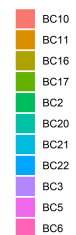**c****b**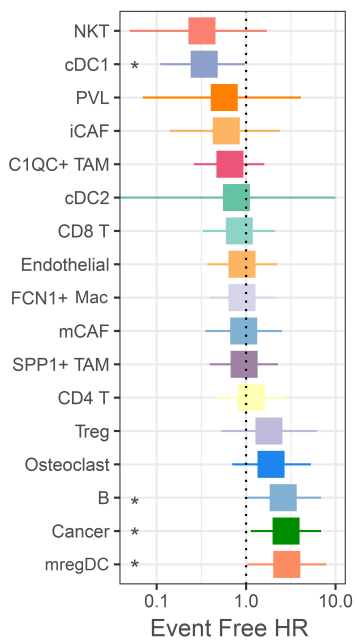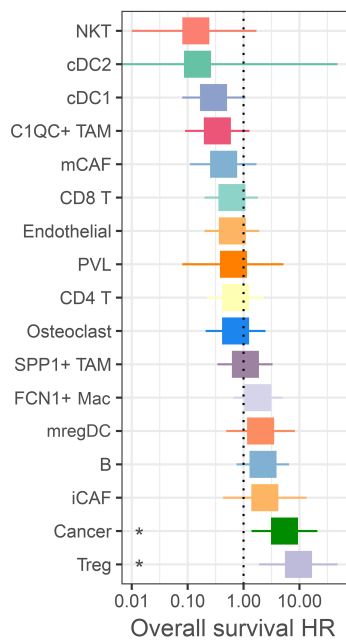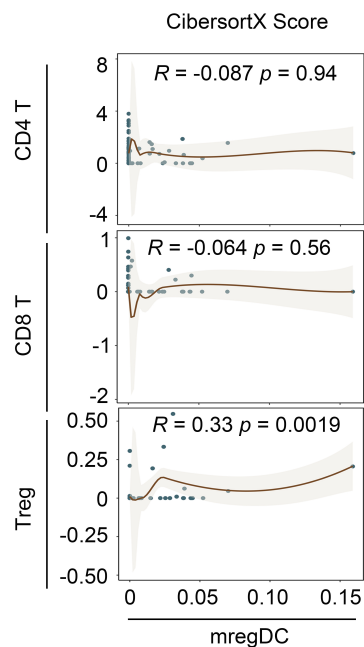

**a**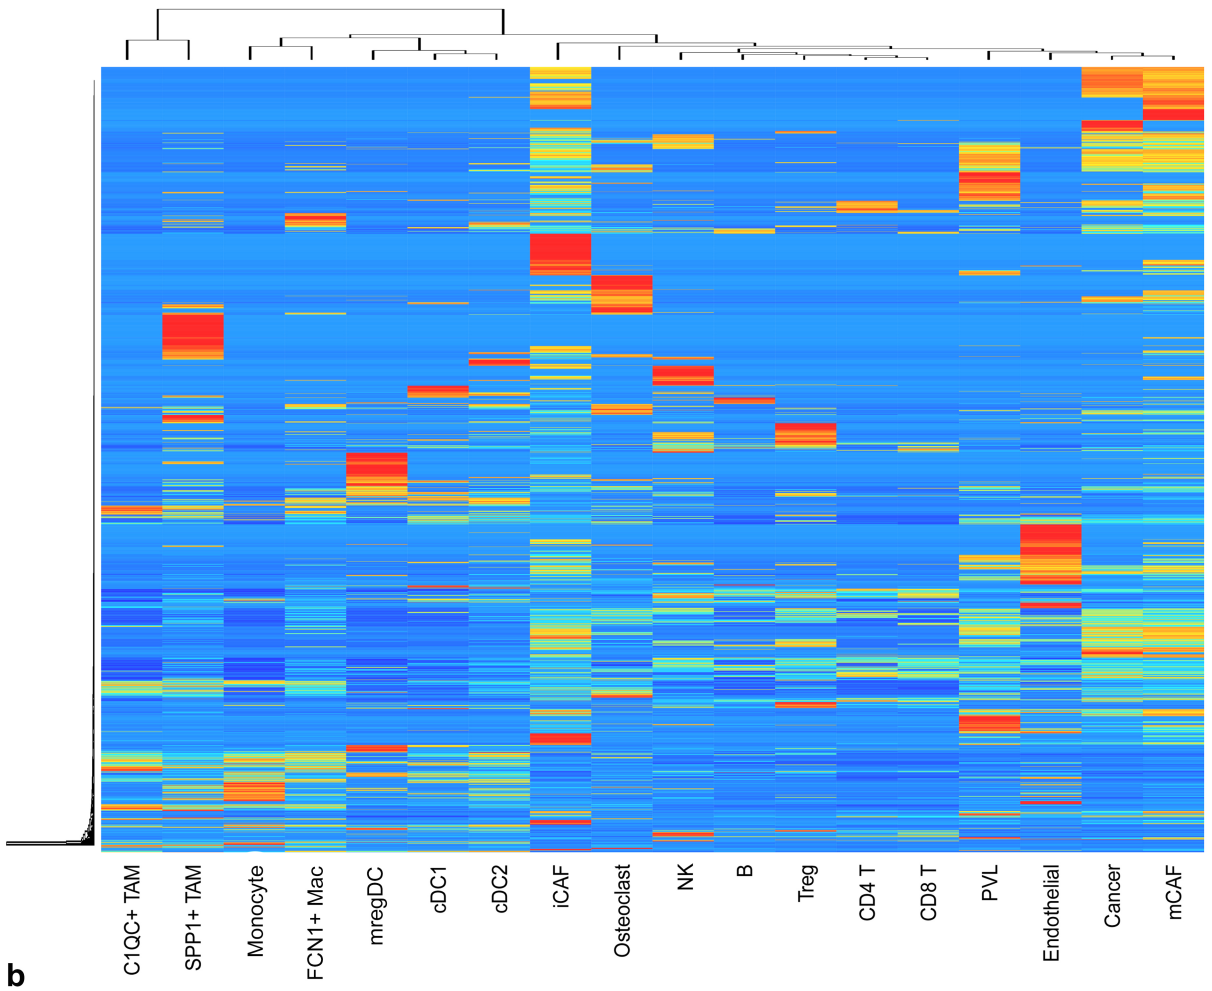**b**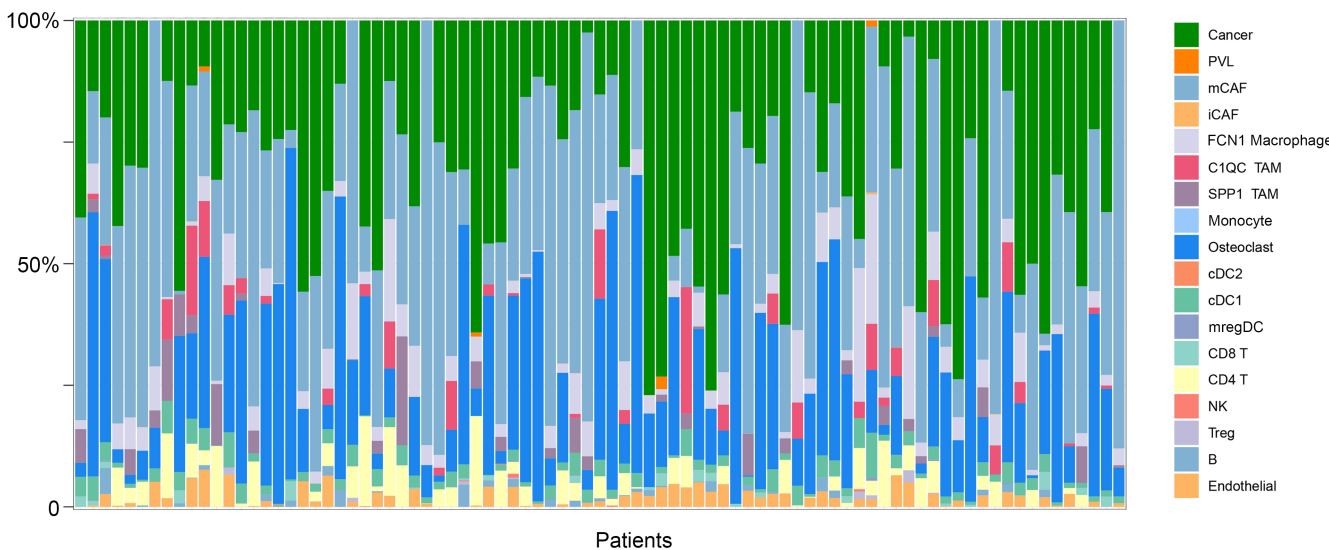

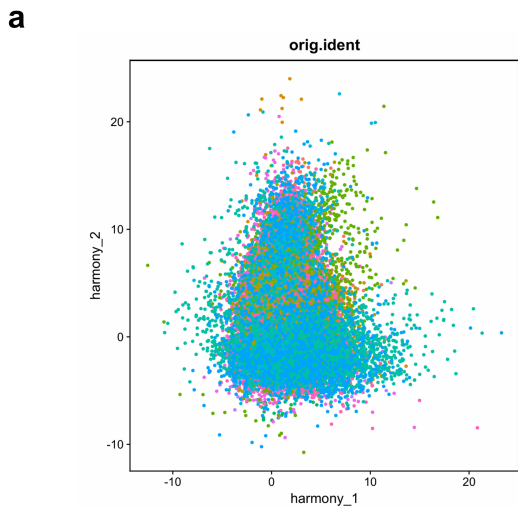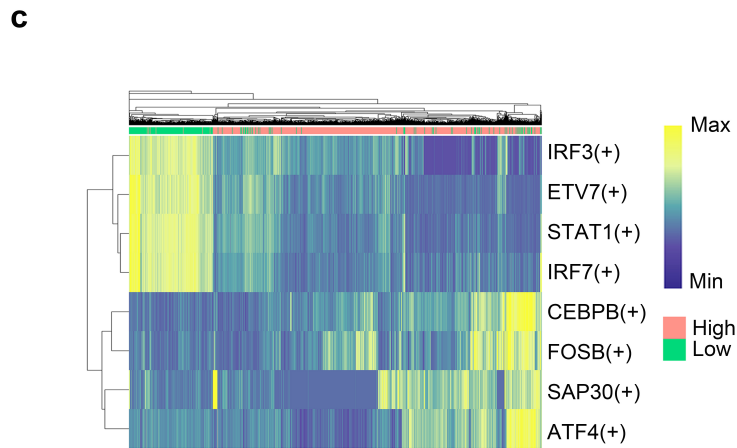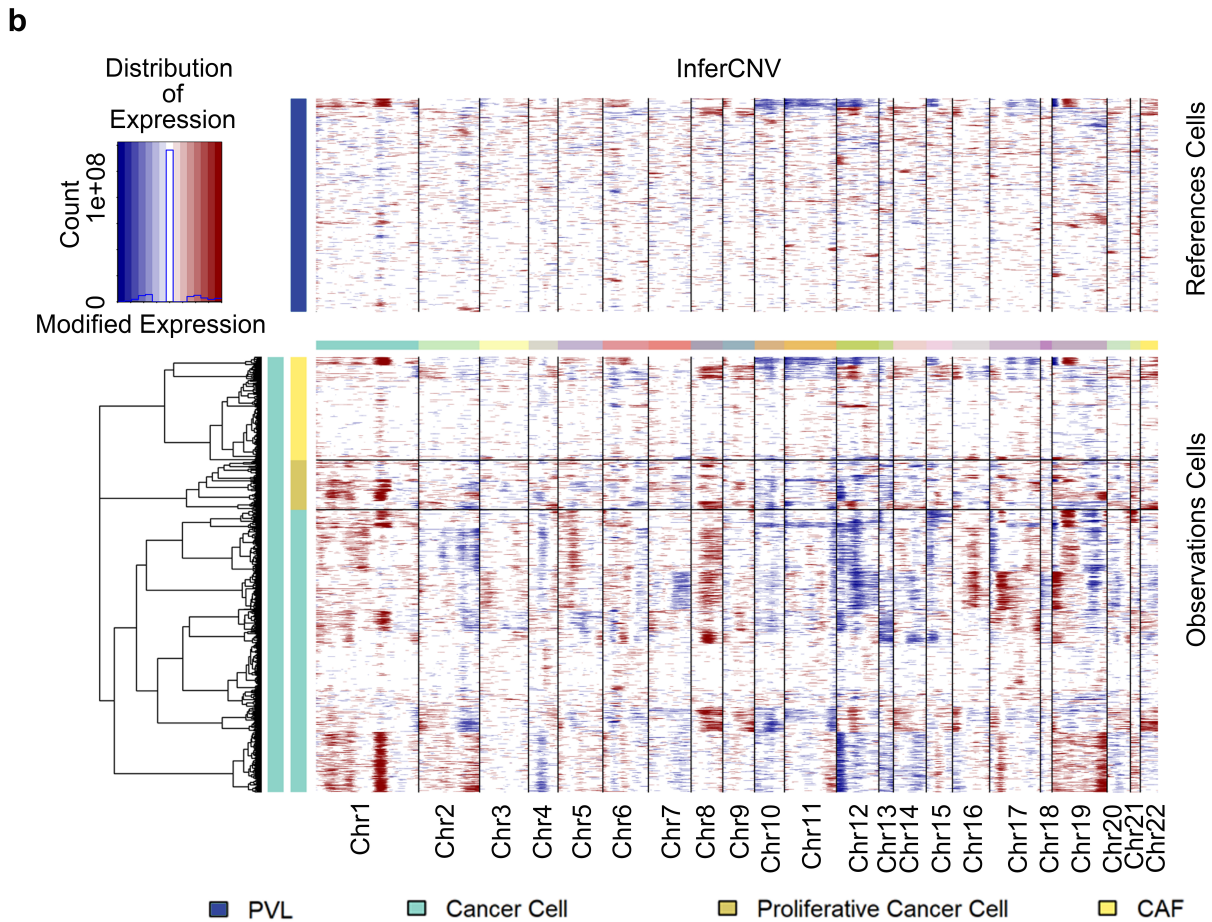

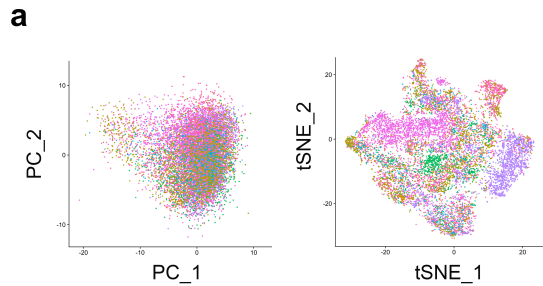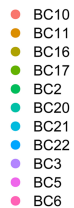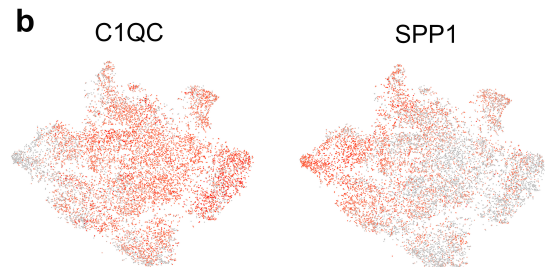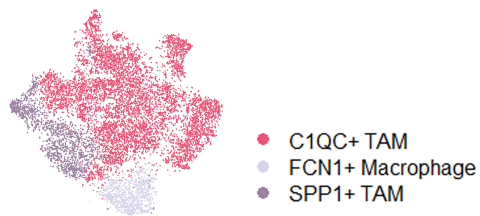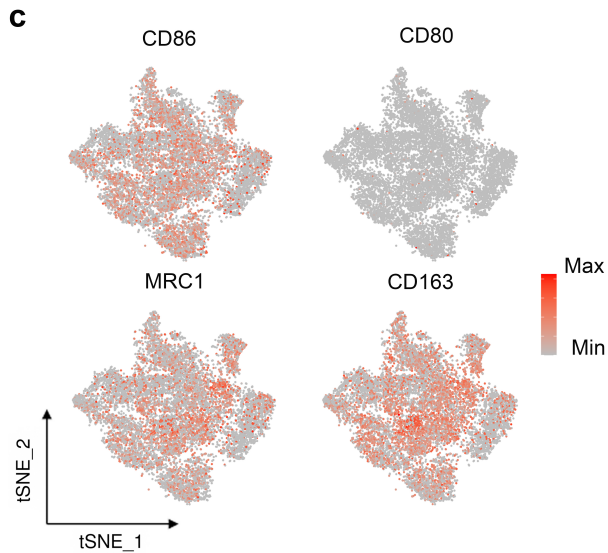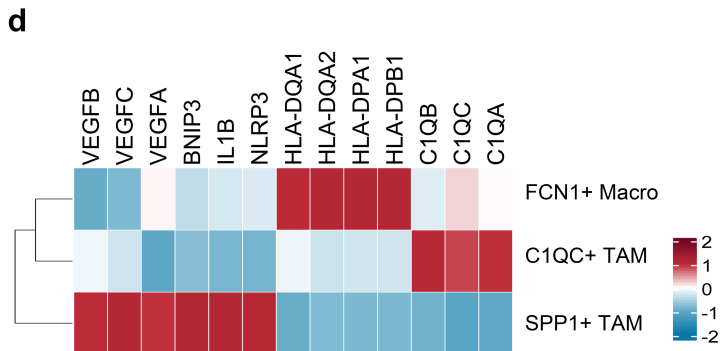

a

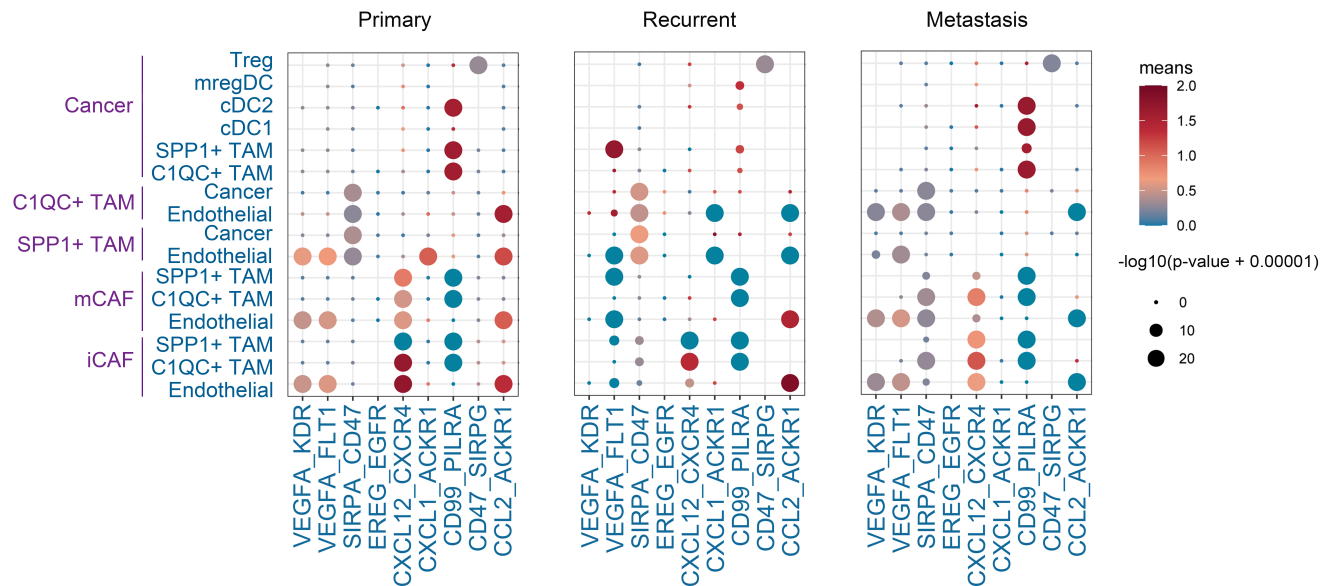

b

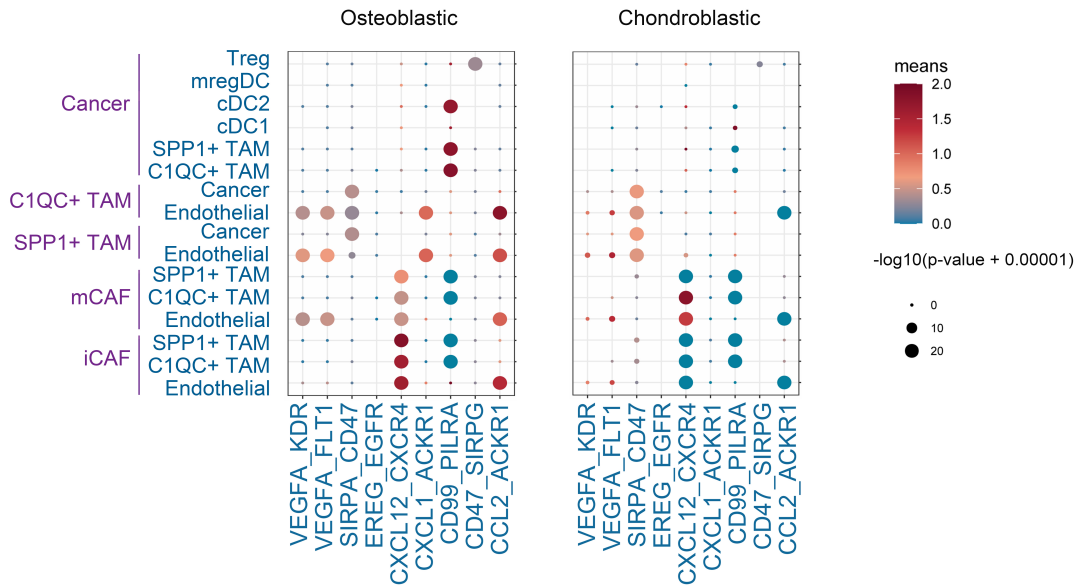

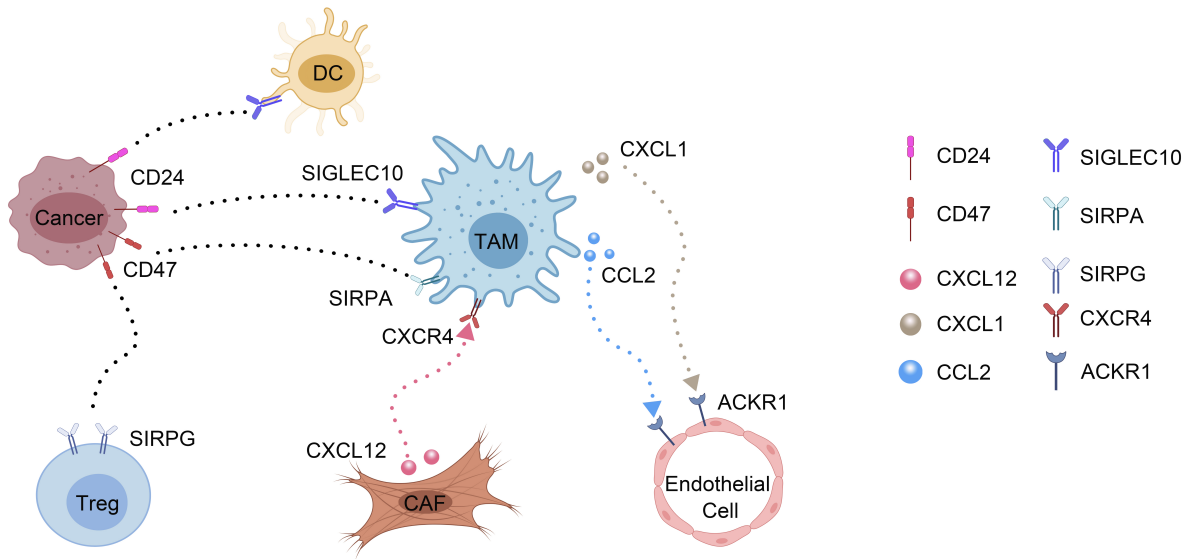

Supplement: 41413_2022_237_MOESM1_ESM.pdf [file 41413_2022_237_MOESM1_ESM.pdf]
